# Supplementary material for: A Potent Inhibitor of the Cystic Fibrosis Transmembrane Conductance Regulator Blocks Disease and Morbidity Due to Toxigenic Vibrio cholerae
Source: MDPI journal article supplement (doi:10.3390/toxins14030225), 2022-03-18
Supplement: s1 [file s1]

Supplementary Materials

# A Potent Inhibitor of the Cystic Fibrosis Transmembrane Conductance Regulator Blocks Disease and Morbidity Due to Toxigenic *Vibrio cholerae*

Fabian Rivera-Chávez, Bradley T. Meader, Sinan Akosman, Vuk Koprivica, and John J. Mekalanos

**Table S1.** *V. cholerae* strains used in this study.

| Strain             | Genotype                                | Reference      |
|--------------------|-----------------------------------------|----------------|
| <i>V. cholerae</i> | El Tor biotype (Sm <sup>r</sup> ) C6706 | Lab Collection |
| <i>V. cholerae</i> | Classical O1 O395                       | Lab Collection |
| <i>V. cholerae</i> | Haiti-1 (H1)                            | [11,30]        |
